# Supplementary material for: Water extract of goji berries improves neuroinflammation induced by a high-fat and high-fructose diet based on the bile acid-mediated gut–brain axis pathway
Source: Royal Society of Chemistry journal article supplement (doi:10.1039/d3fo02651e), 2023-01-01
Supplement: d3fo02651e1.pdf [file d3fo02651e1.pdf]

**Water extract of Goji berries improves neuroinflammation induced by high-fat high-fructose diet based on bile acid-mediated gut-brain axis pathway**

Wei Dong <sup>a</sup>, Yujie Huang <sup>a</sup>, Yifan Shu <sup>a</sup>, Xia Fan <sup>a</sup>, Xinyi Tian <sup>a</sup>, Yamei Yan <sup>b,c</sup>, Jia Mi<sup>b,c</sup>, Lu Lu <sup>b,c</sup>, Xiaoxiong Zeng <sup>a,\*</sup>, Youlong Cao <sup>b,c,\*</sup>

<sup>a</sup> College of Food Science and Technology, Nanjing Agricultural University, Nanjing 210095, Jiangsu, China

<sup>b</sup> Institute of Wolfberry Engineering Technology, Ningxia Academy of Agriculture and Forestry Sciences, Yinchuan, 750002, Ningxia, China

<sup>c</sup> National Wolfberry Engineering Research Center, Yinchuan 750002, Ningxia, China

---

\*To whom correspondence should be addressed. Tel & Fax: +86 25 84396791, E-mail: [zengxx@njau.edu.cn](mailto:zengxx@njau.edu.cn) (X. Zeng); +86 951 6886783, E-mail address: [youlongckh@126.com](mailto:youlongckh@126.com) (Y. Cao)

## Supplementary Materials and methods

### BAs analysis

The cortex, hippocampus and liver were collected and immediately frozen in chilled on dry ice. Samples were stored at  $-80^{\circ}\text{C}$  until analysis. BAs in serum, liver, and brain were measured according to previously reported methods with slight modifications.<sup>1,2</sup> Briefly, an aliquot of 100  $\mu\text{L}$  of plasma was mixed with 200  $\mu\text{L}$  acetonitrile (LC-MS grade), which contained internal standard (CA-d4, GCDCA-d4 and DCA-d4). Intestinal content, cortex, hippocampus, and liver samples were homogenized and extracted in acetonitrile containing deuterated internal standards (CA-d4, GCDCA-d4 and DCA-d4). Then the supernatant was collected by centrifugation at 12000 rpm and  $4^{\circ}\text{C}$  for 20 min. The solvent of the supernatant is evaporated by termovap sample concentrator. The dried powder was reconstituted with 100  $\mu\text{L}$  pure acetonitrile and filtered through a 0.45  $\mu\text{m}$  membrane. Bile acids were then analyzed by UPLC-MS/MS (Sciex Triple Quad 5500 LC-MS/MS, USA).

### References

- 1 G. Xie, W. Zhong, H. Li, Q. Li, Y. Qiu, X. Zheng, H. Chen, X. Zhao, S. Zhang, Z. Zhou, S. H. Zeisel and W. Jia, Alteration of bile acid metabolism in the rat induced by chronic ethanol consumption, *Faseb J.*, 2013, **27**, 3583-3593.
- 2 A. Castellanos-Jankiewicz, O. Guzman-Quevedo, V. S. Fenelon, P. Zizzari, C. Quarta, L. Bellocchio, A. Tailleux, J. Charton, D. Fernandois, M. Henricsson, C. Piveteau, V. Simon, C. Allard, S. Quemener, V. Guinot, N. Hennuyer, A. Perino, A. Duveau, M. Maitre, T. Leste-Lasserre, S. Clark, N. Dupuy, A. Cannich, D.

Gonzales, B. Deprez, G. Mithieux, D. Dombrowicz, F. Backhed, V. Prevot, G. Marsicano, B. Staels, K. Schoonjans and D. Cota, Hypothalamic bile acid-TGR5 signaling protects from obesity, *Cell Metab.*, 2021, **33**, 1483-1492.

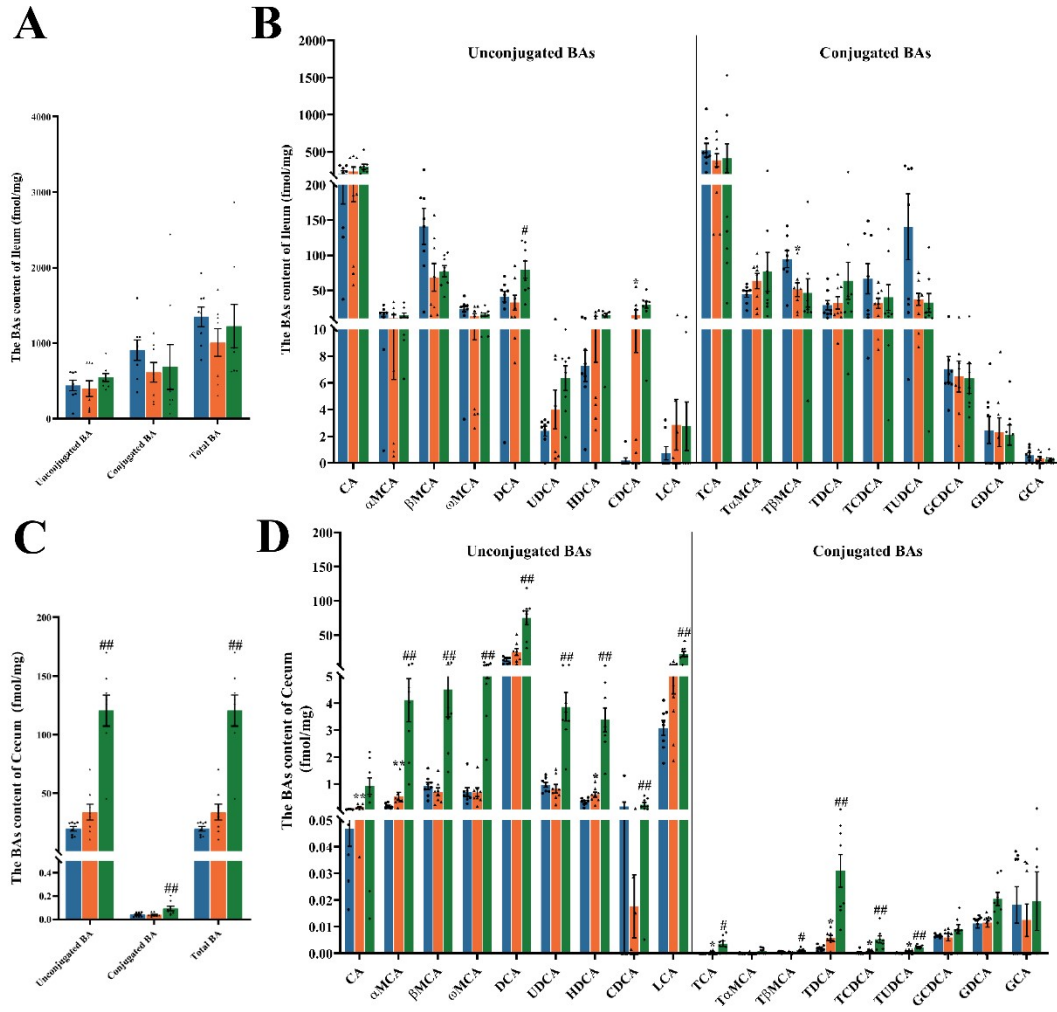

**Fig. S1.** Effects of LBE on ileum and cecum bile acid levels. (A) Effects of LBE on total feces BA levels (n = 8). (H) Feces BA classes and BA profile of mice after LBE intervention (n = 8). Data are presented as mean ± SEM, n = 8. \* $p < 0.05$ , \*\* $p < 0.01$  compared to the NC group, # $p < 0.05$ , ## $p < 0.01$  compared to the HFFD group.

**Table S1** Primer sequences utilized in the RT-qPCR Experiments

| <b>Target gene</b> | <b>Primer Sequence (5'-3')</b>                              |
|--------------------|-------------------------------------------------------------|
| TNF- $\alpha$      | FW: CTCATGCACCACCATCAAGG<br>RV: ACCTGACCACTCTCCCTTTG        |
| IL-1 $\beta$       | FW: AGCTTCAAATCTCGCAGCAG<br>RV: TCTCCACAGCCACAATGAGT        |
| IL-6               | FW: CTCTGGCGGAGCTATTGAGA<br>RV: AAGTCTCCTGCGTGGAGAAA        |
| PSD-95             | FW: TCTGTGCGAGAGGTAGCAGA<br>RV: AAGCACTCCGTGAACTCCTG        |
| CYP7A1             | FW: AGCAACTAAACAACCTGCCAGTACTA<br>RV: GTCCGGATATTCAAGGATGCA |
| CYP27A1            | FW: GCCTCACCTATGGGATCTTCA<br>RV: TCAAAGCCTGACGCAGATG        |
| FXR                | FW: AGGAGCCCCTGCTTGATGT<br>RV: GCGGGTTCTCAGGCTGGTA          |
| FGFR4              | FW: GGCTCCATGACCGTCGTACA<br>RV: ATGACCACTCGAGGAGCTGC        |
| SHP                | FW: AGGGTAGAGGCCATGAGGAG<br>RV: ACGATCCTCTTCAACCCAGA        |
| ZO-1               | FW: TGAGTGCGTTTCTCTCCCTT<br>RV: CCCTCTGTGTTCCCTCATGGT       |
| Occludin           | FW: AGCACTTAACCTGCCTGGAT<br>RV: AGCCTGTGGAAGCAAGAGAT        |
| Claudin-1          | FW: AGCTGCCTGTTCCATGTACT<br>RV: CTCCCATTTGTCTGCTGCTC        |
| GAPDH              | FW: GGACTTACAGAGGTCCGCTT<br>RV: CTATAGGGCCTGGGTCAGTG        |
